# Supplementary material
Source: Springer Nature journal article supplement (http://www.springermedizin.de/resource/supplementary/12876_2010_535_MOESM4_ESM.pdf/9436936)

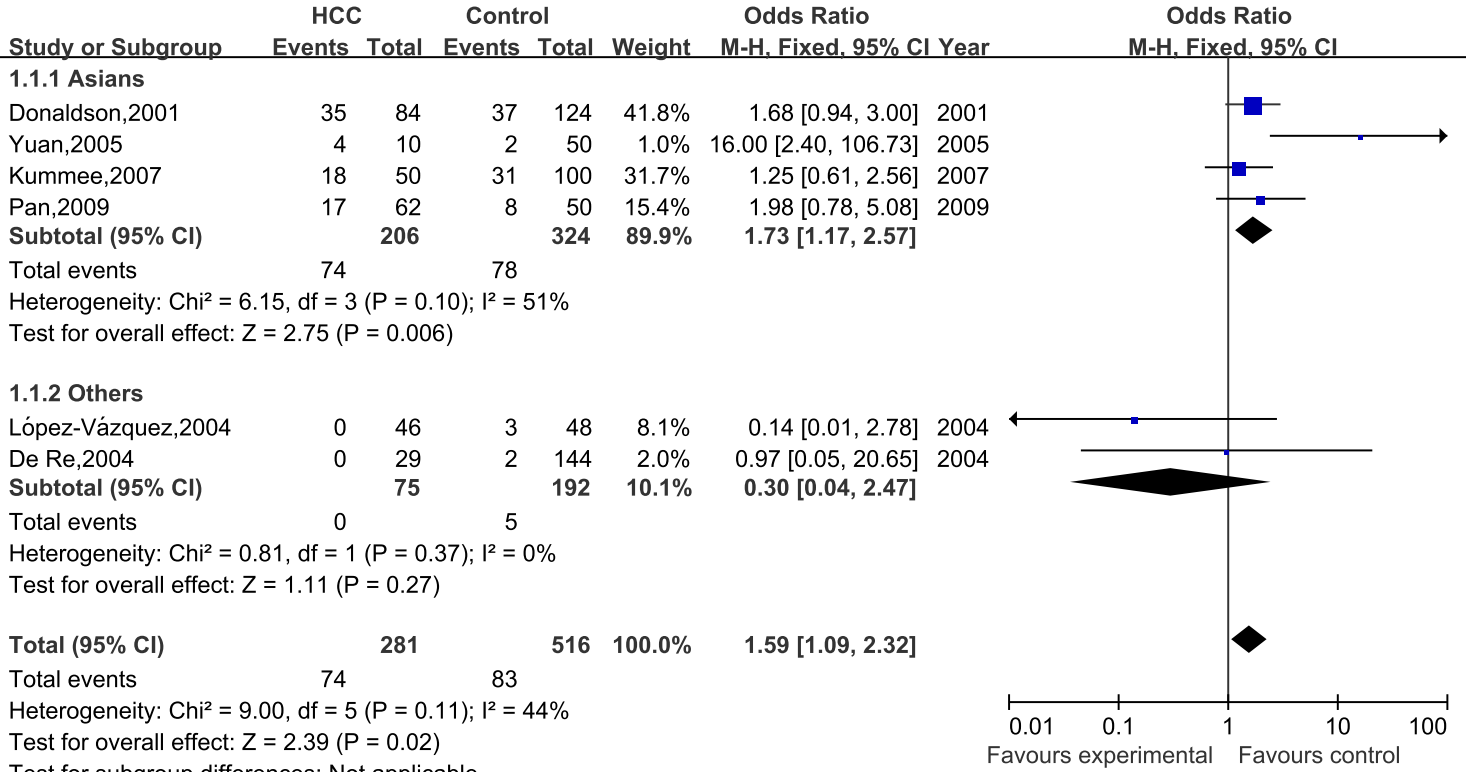

Supplement: MOESM4 [file 9436936]
